# Supplementary material for: Concurrent Infection of the Human Brain with Multiple Borrelia Species
Source: MDPI journal article supplement (doi:10.3390/ijms242316906), 2023-11-29
Supplement: s1 [file s1]

## **Supplementary Material and Methods**

### ***Induction of formation of atypical morphologies of *Borrelia* by antibiotics***

Spirochetes of *B. burgdorferi* s.s. strain NE-5264 were grown in modified Kelly-Pettenkofer medium (MKP) (122). The cultures were incubated at 33°C until cell density reached at least 10<sup>6</sup> spirochetes per milliliter. The absence of contamination and the viability of spirochetes was verified by microscopy. The spirochete concentration was determined using a Petroff-Hausser counting chamber. Five sterile DNase-free Eppendorf tubes with spirochete cultures were treated with antibiotics doxycycline or amoxicillin (Sigma-Aldrich, Burlington, MA, USA) regularly used in the treatment of LD. Each antibiotic was applied at two concentrations: 50 µg/ml and 100 µg/ml. An untreated culture was used as a positive control. After 14 days of antibiotic treatment, the spirochetes ( $7.5 \times 10^7$ ) were washed in 0.1 M HEPES, pelleted by centrifugation (820 × g, 10 min), fixed in 4% formaldehyde with 0.1% glutaraldehyde in 0.1M HEPES for 1h at RT and immediately transferred to freshly prepared 2% agar for processing of paraplast sections.

### ***Infection of laboratory mice (control)***

Susceptible to *Borrelia* mice C3H/HeN genotype were used as laboratory animal model for control experiments. Six weeks old female mice (Charles River, Köln, Germany) were infected by simultaneous subcutaneous and intraperitoneal injections of 10<sup>4</sup> replicating spirochetes in 100 µl of MKP medium per mouse.

### ***Immunohistochemical detection of cultured *Borrelia****

Immunodetection of *Borrelia* on paraplast sections of cultured spirochetes was performed using the same protocol as for human brain tissue. A specifically bound primary antibody was detected by incubation with the goat anti-rabbit IgG conjugated Alexa Fluor 488 secondary antibody (Life Technologies, Carlsbad, CA, USA), diluted 1: 500 in the blocking solution, for 90 minutes at RT in dark.

### ***DNA extraction***

For total DNA purification from all collected samples, the DNeasy Blood and Tissue kit (Qiagen, Hilden, Germany) were used. To increase DNA yield and so the possibility of capture of spirochete DNA in the sample, the entire frozen tissue was weighted, homogenized in liquid nitrogen and then subsequently processed according to the manufacturer's protocol.

### ***Sequencing***

All amplicons of the expected sizes were excised from agarose gels, purified using QIAquick PCR Purification Kit (QIAGEN, Hilden, Germany) and sequenced in both directions using the same primers used for amplification. Sequence analysis was performed commercially by SEQme s.r.o. (Dobris, Czech Republic) and the sequences were compared to those available in the NCBI GenBan database using Basic Local Alignment Tool (BLASTn) analysis.

### ***Cultivation of *Borrelia* from CSF samples***

Five hundred microliters of CSF were transferred to a 5 ml of Barbour-Stoner-Kelly culture medium (BioConcept, Allschwil, Switzerland) supplemented with 6% rabbit serum (Merck, Rahway, NJ, USA) and antibiotics phosphomycin, polymyxin and rifampicin (100x concentrated solution, HiMedia, India diluted 1:100). Seeded cultures were kept at +33°C for two months with regular checks by dark-field microscopy, starting from day 10 after culture initiation.

### *Transmission electron microscopy*

Spirochetes were fixed in 2.5% glutaraldehyde in 0.1M PBS for 1h at RT. Cells were washed three times in 0.1 M PBS with 4% glucose, embedded into 2% of agar, and postfixed in 2% OsO<sub>4</sub> for 1h at RT. After washing, samples were dehydrated stepwise using a graded acetone series (30-50-70-80-90-95%, v/v) for 15 min at each step and transferred to absolute acetone for 15 min. Samples were infiltrated in 2:1, 1:1, and 1:2 mixtures from acetone/stock resin solutions (1h/each step) and finally in two changes of Poly/Bed 812 resin (Polysciences Inc., Warrington, PA, USA) before embedding and polymerization. Ultrathin sections were stained in saturated ethanolic uranyl acetate and lead citrate before imaging in JEM-1400 Flash TEM (JEOL Ltd.).

### Reference

1. Preac-Mursic V, Wilske B, Schierz G. 1986. European *Borrelia burgdorferi* isolated from humans and ticks. Culture conditions and antibiotic susceptibility. Zentralbl Bakteriol Mikrobiol Hyg 263:112–118

**Supplementary Table S1**

| Target           | Primer | GenBank accession number | 5' – 3' nucleotide sequence     | Position 5' (nt)* | Reference           |
|------------------|--------|--------------------------|---------------------------------|-------------------|---------------------|
| <i>ospC</i>      | F1 Ext | U01894                   | ATGAAAAAGAATACATTAAGTGC         | 306               | Bunikis et al. 2004 |
|                  | R1 Ext |                          | ATTAATCTTATAATATTGATTTTAATTAAGG | 933               |                     |
|                  | F2 Int |                          | TATTAATGACTTTATTTTTATTTATATCT   | 331               |                     |
|                  | R2 Int |                          | TTGATTTTAATTAAGGTTTTTTTGG       | 924               |                     |
| <i>flagellin</i> | F1 Ext | X15661                   | AARGAATTGGCAGTTCAATC            | 271               | Clark et al. (2005) |
|                  | R1 Ext |                          | GCATTTTCWATTTTAGCAAGTGATG       | 767               |                     |
|                  | F2 Int |                          | ACATATTCAGATGCAGACAGAGGTTCTA    | 301               |                     |
|                  | R2 Int |                          | GAAGGTGCTGTAGCAGGTGCTGGCTGT     | 663               |                     |
| <i>clpA</i>      | F1 Ext | BB0369                   | GATAGATTTCTTCCAGACAAAG          | 1240              | Margos et al. 2008  |
|                  | R1 Ext |                          | TTCATCTATTA AAAAGCTTTCCC        | 2214              |                     |
|                  | F2 Int |                          | GACAAAGCTTTTGATATTTTAG          | 1255              |                     |
|                  | R2 Int |                          | CAAAAAAACATCAAATTTCTATCTC       | 2104              |                     |
| <i>clpX</i>      | F1 Ext | BB0612                   | GCTGCAGAGATGAATGTGCC            | 391               | Margos et al. 2008  |
|                  | R1 Ext |                          | GATTGATTTCAATAACTCTTTTG         | 1273              |                     |
|                  | F2 Int |                          | AATGTGCCATTGCAATAGC             | 403               |                     |
|                  | R2 Int |                          | TTAAGAAGACCCTCTAAAATAG          | 1124              |                     |
| <i>pyrG</i>      | F1 Ext | BB0575                   | GATTGCAAGTTCTGAGAATA            | 391               | Margos et al. 2008  |
|                  | R1 Ext |                          | CAAACATTACGAGCAAATTC            | 1190              |                     |
|                  | F2 Int |                          | GATATGGAAAATATTTTATTATTG        | 448               |                     |
|                  | R2 Int |                          | AAACCAAGACAAATTCCAAG            | 1154              |                     |
| <i>uvrA</i>      | F1 Ext | BB0837                   | GAAATTTTAAAGGAAATTA AAAAGTAG    | 1408              | Margos et al. 2008  |
|                  | R1 Ext |                          | CAAGGAACAAAAACATCTGG            | 2318              |                     |
|                  | F2 Int |                          | GCTTAAATTTTAAATTGATGTTGG        | 1434              |                     |
|                  | R2 Int |                          | CCTATTGGTTTTTGATTTATTTG         | 2111              |                     |
| <i>pepX</i>      | F1 Ext | BB0627                   | ACAGAGACTTAAGCTTAGCAG           | 362               | Margos et al. 2008  |
|                  | R1 Ext |                          | GTTCCAATGTCAATAGTTTC            | 1172              |                     |
|                  | F2 Int |                          | TTATTCCAAACCTTGCAATCC           | 449               |                     |
|                  | R2 Int |                          | TGTGCCTGAAGGAACATTTG            | 1115              |                     |
| <i>recG</i>      | F1 Ext | BB0581                   | CCCTTGTTGCCTTGCTTTC             | 890               | Margos et al. 2008  |
|                  | R1 Ext |                          | GAAAGTCCAAAACGCTCAG             | 1694              |                     |
|                  | F2 Int |                          | CTTTAATTGAAGCTGGATATC           | 917               |                     |
|                  | R2 Int |                          | CAAGTTGCATTTGGACAATC            | 1658              |                     |
| <i>rplB</i>      | F1 Ext | BB0481                   | TGGGTATTAAGACTTATAAGC           | 2                 | Margos et al., 2008 |
|                  | R1 Ext |                          | GCTGTCCCCAAGGAGACA              | 760               |                     |
|                  | F2 Int |                          | CGCTATAAGACGACTTTATC            | 40                |                     |
|                  | R2 Int |                          | GCTGTCCCCAAGGAGACA              | 760               |                     |
| <i>nifS</i>      | F1 Ext | BB0084                   | ATGGATTTCAAACAAATA AAAAAG       | 1                 | Margos et al. 2008  |
|                  | R1 Ext |                          | GATATTATTGAATTTCTTTTAAG         | 719               |                     |
|                  | F2 Int |                          | ATGGATTTCAAACAAATA AAAAAG       | 1                 |                     |
|                  | R2 Int |                          | GTTGGAGCAAGCATTTTATG            | 680               |                     |

Supplementary Figure S1

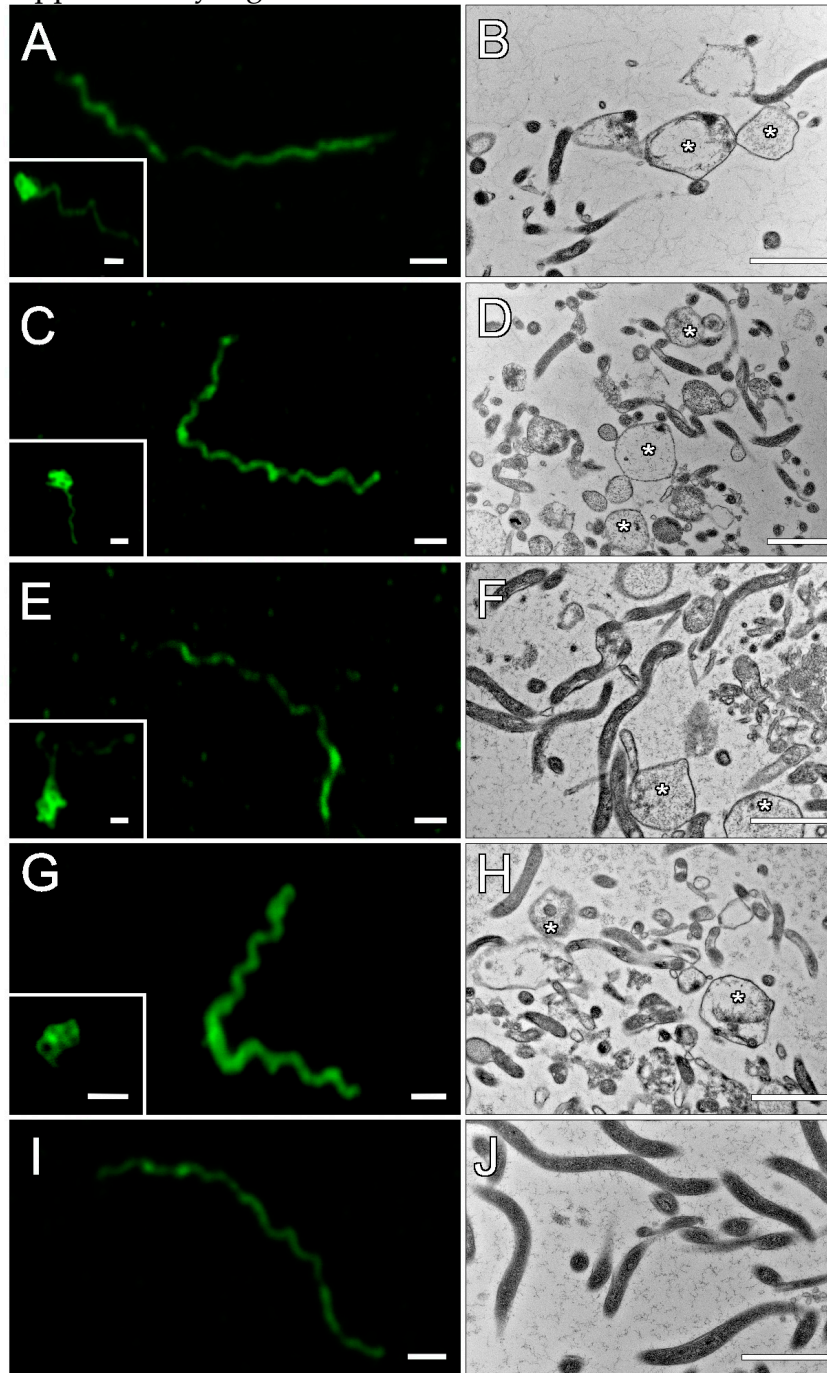

**Supplementary Figure 1.** Spiral and atypical *Borrelia* forms detected after antibiotics treatment. Immunofluorescence and TEM images of *B. burgdorferi* s.s. cultured with amoxycillin (A-D) and doxycycline (E-H) antibiotics at concentrations of 50  $\mu\text{g/ml}$  (A, B, E, F) and 100  $\mu\text{g/ml}$  (C, D, G, H). Both spiral and atypical (asterisk) morphological

forms were observed in antibiotics-treated cultures in contrast to control (I, J). Scale: 1  $\mu\text{m}$ .
